# Supplementary material for: Contribution of Microorganisms to Biogenic Amine Accumulation during Fish Sauce Fermentation and Screening of Novel Starters
Source: MDPI journal article supplement (doi:10.3390/foods10112572), 2021-10-25
Supplement: s1 [file s1]

Table S1 Determination of BA production capacity of dominant isolates.

| Strain                                           | Accession number | PUT        | CAD        | HIS       | TYR        |
|--------------------------------------------------|------------------|------------|------------|-----------|------------|
| <i>S.saprophyticus</i> FDAARGOS_336              | CP022056.2       | 1.53±0.16  | 3.11±0.33  | 4.54±0.44 | 8.58±1.80  |
| <i>S.saprophyticus</i> 201707CJKOP-63            | MG309499.1       | 5.16±0.43  | 5.90±1.58  | 5.35±0.43 | 9.10±0.82  |
| <i>T.halophilus</i> MJ4                          | CP012047.1       | 5.79±1.40  | 3.99±0.81  | 5.48±0.99 | 5.10±0.19  |
| <i>S.nepalensis</i> 5-5                          | MH491965.1       | 1.88±0.43  | 3.03±0.28  | 2.92±0.59 | 7.55±0.60  |
| <i>S.nepalensis</i> 92N2                         | KX495213.1       | 2.35±0.97  | 3.84±0.21  | 2.01±0.14 | 10.42±0.23 |
| <i>T.halophilus</i> KUD23                        | CP020017.1       | 6.28±0.04  | 2.68±0.54  | 3.33±0.27 | 7.55±0.32  |
| <i>S.saprophyticus</i> BBN4P-01d                 | FJ357619.1       | 2.33±0.36  | 2.81±0.63  | 2.82±0.76 | 7.87±0.33  |
| <i>T.sp.</i> HGA-2                               | MG988273.1       | 2.17±0.56  | 3.91±1.06  | 6.20±0.09 | 9.74±0.25  |
| <i>T.halophilus</i> NBRC 12172                   | AP012046.1       | 2.11±0.62  | 3.16±0.64  | 6.64±0.72 | 10.53±0.34 |
| <i>S.saprophyticus</i> subsp. <i>bovis</i> E7-5c | KT989529.1       | ND         | 13.74±1.01 | 5.07±0.91 | 6.28±0.69  |
| <i>T.halophilus</i> LMG 26042                    | CP027768.1       | 11.06±0.46 | 7.86±0.46  | 8.10±0.73 | 7.96±0.57  |
| <i>T.sp.</i> HGA-2                               | MG988273.1       | 2.22±0.45  | 3.18±0.17  | 5.94±0.73 | 9.50±0.02  |
| <i>S.nepalensis</i> JS11                         | CP017466.1       | 1.22±0.09  | 2.25±0.21  | 3.59±0.47 | 8.47±0.12  |
| <i>T.halophilus</i>                              | AB041346.1       | 2.24±0.22  | 2.18±0.30  | 2.96±0.31 | 3.45±0.50  |
| <i>T.halophilus</i>                              | AB041346.1       | 8.21±0.98  | 6.40±0.59  | 7.47±0.53 | 11.53±0.67 |
| <i>T.halophilus</i> MJ4                          | CP012047.1       | 6.40±0.49  | 6.50±0.08  | 5.62±0.06 | 11.26±0.13 |
| <i>T.halophilus</i> MJ4                          | CP012047.1       | 1.68±0.42  | 3.31±0.30  | 5.75±0.50 | 9.89±1.24  |
| <i>T.halophilus</i>                              | AB041346.1       | 9.61±0.86  | 5.00±0.46  | 5.82±0.92 | 8.24±0.07  |
| <i>S.lentus</i> 3-4                              | MH491955.1       | 2.77±0.04  | 3.29±0.02  | 2.32±0.05 | 3.53±0.15  |
| <i>T.halophilus</i> GAM-1                        | MK063724.1       | 2.07±0.73  | 2.21±0.20  | 3.56±0.21 | 12.47±0.27 |
| <i>S.nepalensis</i> 5-5                          | MH491965.1       | 1.49±0.17  | 4.11±0.42  | 2.74±0.26 | 8.48±0.65  |
| <i>S.saprophyticus</i> FDAARGOS_336              | CP022056.2       | 1.13±0.05  | 2.12±0.38  | 2.79±0.27 | 12.51±0.47 |
| <i>S.nepalensis</i> muzW280                      | KM010144.1       | 1.66±0.37  | 2.64±0.35  | 2.56±0.46 | 13.03±0.41 |
| <i>T.halophilus</i> NBRC 12172                   | AP012046.1       | 2.54±0.09  | 2.11±0.38  | ND        | 13.19±0.35 |
| <i>L.amyloliquefaciens</i> LAM0015               | NR_146041.1      | ND         | 3.92±0.33  | ND        | 10.57±0.17 |
| <i>S.capitis</i> +Y36                            | JX113249.1       | 1.96±0.004 | 3.42±0.07  | ND        | 8.62±1.02  |
| <i>L.salicampi</i> SF-20                         | NR_025659.1      | 1.96±0.12  | 5.65±0.38  | ND        | ND         |
| <i>S.hominis</i> ICC_10-1_SCI_contig_1           | MK574685.1       | 1.20±0.01  | 2.61±0.36  | ND        | ND         |
| <i>T.muriaticus</i> PMC-11-5                     | KM042034.1       | 1.32±0.34  | 1.95±0.22  | 4.20±0.51 | 14.18±1.04 |
| <i>S.nepalensis</i> 5-5                          | MH491965.1       | ND         | 2.20±0.32  | 2.50±0.06 | ND         |
| <i>S.nepalensis</i> 5-5                          | MH491965.1       | ND         | ND         | ND        | 4.52±0.26  |
| <i>T.muriaticus</i> LMG 18498                    | NR_116418.1      | 2.10±0.26  | 2.84±0.13  | 2.17±0.09 | ND         |
| <i>S.saprophyticus</i> 201707CJKOP-63            | MG309499.1       | 1.84±0.56  | 4.64±0.34  | 2.84±0.68 | 6.00±0.05  |
| <i>S.nepalensis</i> 5-5                          | MH491965.1       | 1.32±0.27  | 2.60±0.19  | 2.70±0.55 | ND         |
| <i>S.nepalensis</i> 5-5                          | MH491965.1       | 1.26±0.11  | 2.26±0.08  | 2.52±0.25 | ND         |
| <i>S.xyloso</i> JCM 2418                         | NR_113350.1      | ND         | ND         | ND        | 10.44±0.57 |
| <i>T.muriaticus</i>                              | LC306856.1       | 7.52±0.47  | 7.11±0.06  | 4.94±0.16 | 8.87±0.39  |
| <i>S.saprophyticus</i> 91A (BP3)                 | KF254615.1       | 1.43±0.20  | 2.36±0.55  | 2.66±0.19 | 13.47±0.74 |
| <i>S.saprophyticus</i> H72                       | KU922275.1       | 1.52±0.39  | 2.15±0.22  | 3.28±0.21 | 11.65±0.74 |
| <i>S.saprophyticus</i> 201707CJKOP-63            | MG309499.1       | 2.48±0.10  | 3.11±0.24  | 5.41±0.26 | 14.07±1.32 |
| <i>S.saprophyticus</i> CC01                      | MK618636.1       | 2.07±0.05  | 3.26±0.19  | 2.83±0.23 | 15.52±0.97 |

|                                    |             |              |              |           |            |
|------------------------------------|-------------|--------------|--------------|-----------|------------|
| <i>S.nepalensis</i> muzW280        | KM010144.1  | 3.05±0.16    | ND           | 3.08±0.64 | 13.57±0.88 |
| <i>S.saprophyticus</i> TUST017     | KC456631.1  | 2.84±0.19    | 2.82±0.27    | 2.27±0.05 | 13.94±0.92 |
| <i>S.epidermidis</i> CG17          | MK618611.1  | 1.08±0.04    | 2.64±0.42    | 2.13±0.49 | 2.54±0.49  |
| <i>S.epidermidis</i> HBUM07083     | MF662509.1  | 552.41±6.42  | 111.56±0.38  | 2.87±0.03 | 2.60±0.19  |
| <i>S.epidermidis</i> PM221         | HG813242.1  | 496.92±24.14 | 99.60±4.62   | 2.39±0.08 | 3.01±0.52  |
| <i>S.epidermidis</i> ATCC 12228    | AE015929.1  | 541.76±11.20 | 118.21±1.99  | 1.92±0.04 | 2.91±0.08  |
| <i>S.nepalensis</i> JS11           | CP017466.1  | 395.13±14.63 | 9.18±0.46    | 2.61±0.03 | 2.45±0.01  |
| <i>S.nepalensis</i> JS11           | CP017466.1  | 314.27±39.27 | 10.05±1.01   | 2.21±0.29 | 2.24±0.13  |
| <i>S.nepalensis</i> RY31-2         | AB697721.1  | 493.65±34.81 | 33.20±2.38   | 1.84±0.14 | 2.73±0.30  |
| <i>S.nepalensis</i> JS11           | CP017466.1  | 576.26±6.62  | 188.12±2.41  | 2.10±0.30 | 52.25±0.42 |
| <i>T.halophilus</i> FSB201         | AB041346.1  | 481.83±67.23 | 201.19±28.21 | 1.99±0.26 | 2.97±0.85  |
| <i>S.epidermidis</i> CG17          | MK618611.1  | 540.70±8.76  | 249.88±4.23  | 2.41±0.48 | 43.98±0.92 |
| <i>S.nepalensis</i> muzW280        | KM010144.1  | 253.36±15.14 | 5.58±0.13    | 2.51±0.27 | 3.07±0.16  |
| <i>S.epidermidis</i> st9           | MF102140.1  | 171.41±10.74 | 3.55±0.15    | 2.73±0.12 | 2.62±0.32  |
| <i>S.warneri</i> PDS_PXHF51        | MF043130.1  | 241.15±2.51  | 5.52±0.06    | 2.51±0.07 | 3.08±0.06  |
| <i>S.epidermidis</i> BMC2N11_1     | MH050411.1  | 564.90±15.20 | 199.25±5.68  | 2.17±0.16 | 2.63±0.04  |
| <i>T.sp.</i> JNURIC-D12            | GQ150506.1  | 504.61±56.16 | 178.77±20.33 | 2.76±0.42 | 2.16±0.26  |
| <i>S.capitis</i> 3P20              | MF033474.1  | 489.13±58.79 | 47.51±5.38   | 1.94±0.09 | 2.83±0.31  |
| <i>S.hominis</i> BMC3N13_2_1       | MG996860.1  | 555.03±28.45 | 68.62±3.74   | 2.97±0.29 | 2.64±0.11  |
| <i>S.epidermidis</i> 3-13          | MK880646.1  | 532.74±2.54  | 57.86±0.53   | 1.94±0.02 | 2.41±0.07  |
| <i>S.epidermidis</i> CAU8047       | MF429628.1  | 559.51±15.88 | 222.90±6.37  | 2.40±0.47 | 58.52±1.66 |
| <i>S.nepalensis</i> JS9            | CP017459.1  | 559.64±7.20  | 183.58±2.61  | 2.16±0.09 | 52.30±0.16 |
| <i>S.saprophyticus</i> CC01        | MK618636.1  | 529.01±12.04 | 42.53±0.83   | 1.88±0.02 | 2.54±0.13  |
| <i>S.epidermidis</i> HCD27-5       | MH111598.1  | 216.08±0.58  | 4.63±0.03    | 2.30±0.06 | ND         |
| <i>S.epidermidis</i> P32_BA1H      | MK883070.1  | 158.49±1.91  | 3.10±0.08    | 2.12±0.12 | 2.55±0.08  |
| <i>S.nepalensis</i> CW1            | NR_028996.1 | 245.26±13.19 | 5.86±0.29    | 2.19±0.11 | 3.08±0.18  |
| <i>S.nepalensis</i> CW1            | NR_028996.1 | 302.84±15.77 | 5.38±0.15    | 2.82±0.05 | 2.79±0.07  |
| <i>S.nepalensis</i> CW1            | NR_028996.1 | 396.94±3.50  | 6.37±0.64    | ND        | ND         |
| <i>T.halophilus</i> MRS-1          | MK063722.1  | 555.47±17.48 | 128.31±4.46  | 3.07±0.23 | 1.72±0.02  |
| <i>T.halophilus</i> subsp. GZH2-18 | MG654641.1  | 564.80±20.54 | 162.68±6.10  | 2.65±0.28 | 2.77±0.08  |
| <i>T.halophilus</i> MRS-1          | MK063722.1  | 231.04±5.71  | 5.49±0.33    | 2.42±0.40 | 3.73±0.98  |
| <i>T.halophilus</i> FSB201         | AB041346.1  | 549.60±15.62 | 55.87±1.39   | 2.24±0.03 | 2.77±0.07  |
| <i>T.halophilus</i> NBRC 12172     | AP012046.1  | 555.86±10.47 | 189.35±3.33  | 2.37±0.41 | 59.09±0.95 |
| <i>T.halophilus</i> GAM-1          | MK063724.1  | 372.52±0.63  | 7.97±0.01    | 2.62±0.05 | ND         |
| <i>T.halophilus</i> FSB201         | AB041346.1  | 548.93±17.95 | 180.58±5.69  | 2.13±0.09 | 51.77±2.37 |
| <i>T.sp.</i> SZ-B-2                | KC170304.1  | 603.73±34.41 | 213.56±11.89 | 2.79±0.17 | ND         |
| <i>T.halophilus</i> NBRC 12172     | AP012046.1  | 546.49±29.16 | 101.23±5.49  | 2.03±0.22 | 2.78±0.15  |
| <i>T.halophilus</i> MRS-1          | MK063722.1  | 164.77±3.56  | 3.30±0.19    | 1.97±0.09 | 2.59±0.09  |
| <i>T.halophilus</i> MJ4            | CP012047.1  | 402.29±6.52  | 6.15±0.10    | ND        | ND         |
| <i>T.halophilus</i> GAM-1          | MK063724.1  | 554.29±48.94 | 68.32±6.19   | 2.36±0.24 | 2.28±0.12  |
| <i>T.muriaticus</i> JCM 10007      | LC306856.1  | 565.92±10.39 | 113.66±1.90  | 2.08±0.02 | ND         |
| <i>T.muriaticus</i> 15-6           | LC136876.1  | 509.23±11.95 | 368.07±7.12  | 2.45±0.24 | 2.72±0.33  |
| <i>T.muriaticus</i> LMG 18498      | NR_116418.1 | 197.82±2.94  | 7.29±0.69    | ND        | 3.02±0.02  |

|                               |              |              |              |           |            |
|-------------------------------|--------------|--------------|--------------|-----------|------------|
| <i>T.muriaticus</i> 10-1      | AB822564.1   | 147.80±5.40  | 2.74±0.03    | 2.29±0.04 | 2.59±0.14  |
| <i>T.sp.SZ-B-2</i>            | KC170304.1   | 514.74±20.48 | 118.94±4.87  | 2.81±0.20 | ND         |
| <i>T.halophilus</i> FSB201    | AB041346.1   | 562.93±9.16  | 183.81±2.37  | 1.77±0.05 | 52.62±0.59 |
| <i>T.halophilus</i> FSB201    | AB041346.1   | 552.61±13.09 | 180.46±4.42  | 2.08±0.10 | 50.07±1.11 |
| <i>T.sp.SZ-B-2</i>            | KC170304.1   | 569.45±8.58  | 114.15±1.33  | 2.49±0.08 | 2.91±0.05  |
| <i>T.halophilus</i> GAM-1     | MK063724.1   | 517.96±17.68 | 57.70±1.77   | 2.04±0.03 | 2.31±0.07  |
| <i>T.muriaticus</i> 15-6      | LC136876.1   | 586.31±9.39  | 199.35±2.29  | 2.65±0.45 | 62.51±0.90 |
| <i>T.muriaticus</i> 15-6      | LC136876.1   | 377.28±34.62 | 8.79±0.41    | 2.56±0.13 | 2.39±0.09  |
| <i>T.muriaticus</i> 15-6      | LC136876.1   | 527.96±27.24 | 232.44±12.13 | 2.53±0.05 | 3.20±0.16  |
| <i>T.muriaticus</i> JCM 10007 | LC306856.1   | 410.30±15.09 | 9.39±0.33    | 2.35±0.32 | 2.38±0.05  |
| <i>T.muriaticus</i> JCM 10007 | LC306856.1   | 568.96±4.50  | 251.17±2.26  | 2.67±0.12 | 3.10±0.23  |
| <i>T.halophilus</i> KUD23     | CP020017.1   | 576.83±11.21 | 187.76±3.68  | 2.09±0.04 | 51.87±0.78 |
| <i>T.muriaticus</i> JCM 10007 | LC306856.1   | 581.46±22.05 | 117.41±3.79  | 2.69±0.13 | 2.90±0.12  |
| <i>Psychrobacter</i> MRYB_s   | MRYB01000024 | 558.16±22.46 | 62.78±2.70   | 2.36±0.16 | 2.57±0.18  |
| <i>Pseudomonas</i> stutzeri   | CP002881     | 409.16±21.10 | 9.47±0.51    | 3.10±0.72 | 2.49±0.17  |
| <i>L.salicampi</i> SF-20      | NR_025659.1  | 580.29±5.79  | 197.78±1.61  | 2.60±0.18 | 61.52±0.22 |

Data are expressed as mean ± SDs (n=3).; ND: not detected. Different letters (a, b, c, etc.) indicate the mean value of significant difference at P<0.05. (R3M, R6M, R9M, R12M, R18M indicated for 3, 6, 9,12,18 months, respectively. PUT: putrescine, CAD: cadaverine, HIS: histamine, TYR: tyramine).
